# Supplementary material for: Clinical and paraclinical characteristics of optic neuritis in the context of the McDonald criteria 2017
Source: PubMed Central journal article supplement (PMC10973511; doi:10.1038/s41598-024-57199-4), 2024-03-27
Supplement: 41598_2024_57199_MOESM1_ESM.pdf [file 41598_2024_57199_MOESM1_ESM.pdf]

## Clinical and paraclinical characteristics of optic neuritis in the context of the

### McDonald criteria 2017

K. F. Jendretzky<sup>1</sup>, A. Bajor<sup>2</sup>, LM. Lezius<sup>1</sup>, M. W. Hümmert<sup>1</sup>, FF. Konen<sup>1</sup>, GM. Große<sup>1</sup>, P. Schwenkenbecher<sup>1</sup>, KW. Sühs<sup>1</sup>, C. Trebst<sup>1</sup>, C. Framme<sup>2</sup>, M. P. Wattjes<sup>3</sup>, S. G. Meuth<sup>4</sup>, S. Gingele<sup>1\*</sup>, T. Skripuletz<sup>1\*#</sup>

**Supplementary Table S1: Frequency distribution of clinical characteristics in MOGAD and NMOSD patients**

|                                        | All          | MOGAD          | NMOSD        |
|----------------------------------------|--------------|----------------|--------------|
| <b>Number of patients</b>              | 25           | 14             | 11           |
| <b>Female, % (n)</b>                   | 68% (17/25)  | 71% (10/14)    | 64% (7/11)   |
| <b>Age, median (25%-75% IQR)</b>       | 42 (29.5-55) | 42.5 (28.5-51) | 42 (36-61)   |
| <b>Visual phenomena, % (n)</b>         | 96% (24/25)  | 93% (13/14)    | 100% (11/11) |
| <b>Retrobulbar pain, % (n)</b>         | 56% (14/25)  | 64% (9/14)     | 45% (5/11)   |
| <b>Dyschromatopsia, % (n)</b>          | 52% (13/25)  | 50% (7/14)     | 55% (6/11)   |
| <b>Combination of all three, % (n)</b> | 32% (8/25)   | 29% (4/14)     | 36% (4/11)   |
| <b>RAPD positive, % (n)</b>            | 43% (10/23)  | 33% (4/12)     | 55% (6/11)   |

*Analysis of the frequency distribution of clinical characteristics in MOGAD and NMOSD*

*patients. MOGAD, Myelin oligodendrocyte glycoprotein antibody-associated disease;*

*NMOSD, neuromyelitis optica spectrum disorder; RAPD, relative afferent pupillary defect.*
